# Supplementary material for: Thyroid dysfunction in preterm infants born before 32 gestational weeks
Source: BMC Pediatr. 2019 Oct 29;19:391. doi: 10.1186/s12887-019-1792-0 (PMC6819381; doi:10.1186/s12887-019-1792-0)
Supplement: Supplementary file 1 — Additional file 1. The raw data set including demographics and all results of serial thyroid function tests of the study population. [file 12887_2019_1792_MOESM1_ESM.xlsx]

## Sheet: Sheet1
male_1	GA	BwtG	cesarean section	multiple gestation	AS1	AS5	Maternal age	antenatal STE	PROM	PIH	GDM	SGA	RDS	BPD	PDA	NEC	IVH	PVL	ROP	earlysepsis	latesepsis	baby_T4 (1)	T4 day	T4_PMA	wk_1	fT4_1w	TSH_1w	wk_3	fT4_3w	TSH_3w	wk_6	fT4_6w	TSH_6w	wk_10	fT4_10w	TSH_10w	Hospital days
0	202	1050	C	0	1	5	27	1	1	0	0	0	1	0	1	0	0	0	1	0	0	1	95	297	6	0.99	2.24	27	0.9	5.89	53	0.76	7.21				67
1	198	1065	C	1	5	7	32	1	1	0	0	0	1	1	1	0	0	0	0	0	0	0			7	0.84	2.3	21	1.78	10.9	32	1.19	11.31	61	1.63	2.51	100
1	198	1065	C	1	5	7	32	1	1	0	0	0	1	0	1	0	0	0	0	0	0	0			6	1.86	2.27	28	1.13	8.24	56	1.32	3.84				100
0	196	1145	C	0	6	8	30	1	1	0	0	0	0	0	1	0	0	0	0	0	0	0			6	0.87	3.74	17	1.15	11.31	47	1.05	16.14	88	0.97	3.79	61
0	178	610	C	0	1	5	33	1	0	1	0	0	1	1	1	0	0	0	0	0	0	0			9	0.85	8.38	20	1.13	5.33	42	1.2	7.57	98	0.92	5.87	104
1	181	725	C	0	3	6	40	1	0	1	0	0	1	1	1	0	0	0	0	0	0	0			7	0.7	1.08	21	1.24	4.54	42	1.11	2.97				132
1	169	730	C	0	1	6	32	1	1	0	0	0	1	1	1	0	1	0	1	1	1	1	59	228	8	0.85	3.75	24	1.04	3.47	46	1.1	9.98				124
1	188	1260	V	0	5	7	30	1	1	0	0	0	0	1	1	0	0	0	0	0	1	0			6	0.98	1.2	22	0.65	0.29	46	1.74	5.61				219
0	197	1125	C	0	5	7	30	1	0	0	0	0	1	1	1	0	0	0	0	0	0	0			6	1.21	2.1	25	1.35	10.46	56	1.24	11.06	86	2.89	2.8	100
0	191	950	C	0	5	7	28	1	0	1	0	0	1	0	1	0	0	0	0	0	0	0			9	1.69	5.16	20	1.16	1.86	54	1.03	6				80
0	176	640	C	1	3	6	33	1	1	0	0	0	1	1	1	0	1	0	1	0	0	0			9	1.5	4.07	23	1.26	7.65	42	1.17	5.05				109
1	189	785	C	0	1	6	26	1	1	0	0	1	1	0	1	0	0	0	0	0	0	0			5	0.93	4.48	25	1.11	7.04	39	1.03	6.84	69	1.39	4.03	74
0	207	1305	C	0	1	6	39	1	1	0	0	0	0	1	0	0	0	0	0	0	0	0			6	1.36	4.57	23	1.56	8.23	46	1.38	5.98	90	1.33	3.07	123
0	188	895	C	0	3	6	36	0	0	0	0	0	1	1	1	0	0	0	1	0	1	0			7	1.68	7.82	21	1.6	4.68	42	0.89	4.66				94
1	196	595	C	0	4	6	28	1	1	1	0	1	0	1	1	0	0	0	0	0	0	1	28	224	8	1.64	7.34	28	1.27	42.36	45	1.46	9.11				84
1	194	995	C	0	1	6	27	1	0	0	0	0	1	0	1	1	0	0	0	0	0	0			7	1.35	1.98	20	1.5	3.81	48	1.07	2.16				70
1	198	1230	V	0	6	7	31	1	1	0	0	0	1	0	1	0	0	0	0	0	0	0			7	1.01	1.02	21	1.19	1.63	39	1.11	1.52				74
0	213	1460	C	0	6	7	31	0	1	0	0	0	0	0	0	0	0	0	0	0	0	0			6	1.07	3.89	19	1.17	5.13	49	1.06	8.93				56
1	201	1040	V	0	7	8	32	1	1	0	0	0	0	1	0	0	0	0	0	0	0	0			7	1.13	8.03	25	1.34	7.58	53	1.02	2.01				71
0	190	600	C	0	2	6	35	1	0	1	0	1	1	1	1	1	0	0	0	0	1	1	81	271	5	0.68	6.99	20	1.28	4.06	53	0.87	8.1				88
0	206	905	C	0	7	8	28	1	0	1	0	0	1	0	1	0	0	0	0	0	0	1	27	233	8	1.47	6.79	27	0.83	25.28	37	1.19	8.14				64
1	220	1615	C	1	7	8	31	0	0	0	0	0	1	1	1	0	1	0	0	0	0	0			7	1.65	10.98	21	1.15	3.13	56	1.07	4.75				83
1	185	830	C	1	4	6	33	1	0	0	1	0	1	0	1	0	0	0	0	0	0	0			6	0.95	1.8	17	1.31	5.3	45	0.95	3.79				61
1	185	760	C	1	5	7	33	1	0	0	1	0	1	1	1	0	0	0	0	0	0	0			6	1.07	3.75	27	1.15	5.13	48	1.18	6.3	69	1.2	4.92	104
1	202	1280	V	1	4	6	30	1	1	1	0	0	1	0	1	0	0	0	0	0	0	0			7	1.44	8.19	15	1.46	9.3	35	1.22	6.97	84	0.99	4.82	68
1	202	890	V	1	6	8	30	1	1	1	0	1	1	1	1	0	0	0	0	0	0	0			7	1.54	14.94	28	0.9	7.01	35	1.39	6.1	73	1.31	5.55	108
1	208	1265	V	0	2	5	21	1	1	0	0	0	1	1	1	0	0	0	0	0	0	0			6	0.86	5.97	21	1.18	7.43	42	0.93	9.14	63	0.8	4.67	87
0	181	925	V	0	7	7	30	1	1	0	0	0	0	1	1	0	0	0	1	0	0	0			9	0.99	4.25	25	0.99	9.5	39	0.84	6.74	119	1.01	4.87	150
1	183	760	C	1	7	8	29	1	1	0	0	0	1	0	1	0	0	0	1	0	0	0			7	1.48	3.48	26	1.11	5.95	53	0.81	1.1				97
0	195	990	C	0	5	6	39	1	0	1	0	0	1	0	1	0	0	0	1	0	0	0			7	1.39	3.03	28	1.03	8.37	42	1.14	6.15	65	0.99	3.13	59
1	173	780	V	0	1	6	31	1	1	0	0	0	1	1	1	0	1	0	1	0	1	0			7	1.3	0.82	15	0.7	1.93	42	1.61	4.45				124
1	188	1085	C	1	3	5	28	1	1	0	0	0	1	0	1	0	0	0	0	0	0	0			5	1.73	1.93	22	0.98	8.16	42	0.84	2.86				74
1	188	885	C	1	5	6	28	1	1	0	0	0	1	0	1	0	0	0	1	0	0	0			8	1.16	2.28	26	0.84	6.12	47	1.17	2.69				61
0	205	825	C	1	7	7	31	1	0	1	0	0	1	1	1	0	0	0	0	0	0	1	25	230	7	1.8	9.15	25	0.58	29.97	32	1.71	1.41				81
0	194	860	C	0	6	7	38	1	1	0	0	0	1	1	0	0	1	0	0	0	0	0			6	1.08	0.97	15	1.46	4.93	42	1.44	3.09				86
1	188	990	C	1	5	7	31	1	0	0	0	0	0	1	1	0	0	0	0	0	0	0			7	1.1	3.53	21	1.35	7.68	40	1.42	3.19				90
1	188	980	C	1	4	6	31	1	0	0	0	0	1	0	1	0	0	0	0	0	0	0			7	1.09	3.31	19	0.91	6.76	33	1.13	3.55				67
1	174	650	V	0	5	6	30	1	1	0	0	0	0	1	1	0	1	0	1	0	1	1	34	208	6	0.86	2.08	20	0.94	10.63	34	0.74	20.7				119
0	202	1200	C	0	6	8	34	1	0	1	0	0	1	0	1	0	0	0	0	0	0	0			7	1.46	2.24	21	1.52	12.65	42	1.38	7.98				57
1	208	1135	C	0	4	6	35	0	0	1	0	0	1	0	1	0	0	0	0	0	0	0			7	1.54	8.32	21	1.31	7.7	49	1.21	6.52				59
0	186	760	V	0	4	5	35	1	1	0	0	0	1	1	1	1	0	0	1	0	0	0			7	0.88	3.51	26	1.58	6.24	47	1.15	3.52				93
0	200	935	C	0	1	3	31	1	1	1	1	0	1	0	1	0	1	0	1	0	0	0			9	1.5	5.69	23	1.34	12.82	37	1.39	3.93				101
1	198	1230	V	0	7	8	30	1	0	0	0	0	1	1	1	0	0	0	0	0	0	0			7	0.85	2.13	25	0.99	6.66	42	1.28	1.58				129
1	200	1010	C	0	2	6	39	1	0	1	0	0	0	0	0	0	0	0	0	0	0	1	20	220	6	1.31	2.87	20	1	37.88	37	1.18	4.02				66
0	220	1795	C	0	4	7	34	1	1	0	0	0	1	0	0	0	0	0	0	0	0	0			7	1.57	5.11	27	1.51	6.96	44	1.16	2.91				58
1	168	470	C	0	4	5	37	1	0	1	0	1	1	1	1	0	0	0	1	0	1	0			9	0.8	0.55	23	0.44	8.24	37	1.02	4.29				439
1	205	1085	C	0	2	5	35	0	0	1	0	0	1	1	1	0	0	0	0	0	1	0			6	1.45	4.64	15	1.05	4.76	34	1.2	4.82				69
1	201	1350	V	1	3	5	25	1	1	0	0	0	1	0	1	0	0	1	0	0	0	0			9	1.63	6.18	19	1.05	18.26	51	1.02	4.26				58
1	201	830	V	1	2	4	25	1	1	0	0	0	1	0	0	0	0	0	0	0	0	0			9	1.17	13.17	19	1.17	7.83	33	1.13	6.52	86	1.28	4.23	60
1	178	750	C	0	3	5	35	1	1	0	0	1	1	1	1	1	0	0	1	0	0	0			9	0.7	4.98	19	0.8	7.78	33	0.89	9.93	87	0.8	1.21	346
1	190	1285	V	0	5	7	30	1	0	0	0	0	0	1	0	0	0	0	1	0	0	0			7	1.56	1.53	22	0.91	8.67	56	1.33	4.43				57
1	193	845	C	0	1	2	33	1	0	1	0	0	1	1	1	0	0	0	1	0	0	0			8	0.82	5.02	24	1.26	9.68	45	1.31	10.16	60	1.36	5.25	84
1	204	685	C	0	5	7	32	1	0	1	0	1	1	1	0	0	1	0	1	0	1	0			9	1.17	3.27	20	1.37	6.91	42	1.37	4.72				72
0	214	1575	V	0	4	6	34	1	1	0	0	0	0	0	0	0	0	0	0	0	0	0			9	1.46	9.53	28	1.49	12.43	43	1.62	7.69				61
0	214	1075	C	0	5	8	28	1	0	1	0	1	0	0	1	0	0	0	0	0	1	1	32	246	6	2.14	6.52	16	1.49	13.36	32	1.09	23.41				57
1	195	880	C	0	3	5	36	1	0	1	0	0	1	0	1	0	0	0	0	0	0	0			9	1.36	6.76	28	1.46	7.6	42	1.57	5.82				71
0	210	770	V	0	2	6	34	1	0	0	0	1	0	0	0	0	1	0	1	0	0	0			7	1.3	1.27	21	1.5	2.48	49	1.31	3.01				74
1	179	715	C	0	1	2	34	1	0	0	0	0	1	0	1	0	0	0	1	0	0	0			6	1.28	4.09	28	1.38	1.1	42	1.09	1.83				108
1	217	1790	C	1	5	4	29	1	0	0	0	0	1	0	1	0	0	1	0	0	0	1	21	238	7	1.23	4.52	21	1.32	32.54	36	1.25	2.94				72
1	217	1045	C	1	3	5	29	1	0	0	0	1	1	1	1	0	0	0	0	0	0	1	37	254	7	0.98	4.74	28	0.79	17.19	37	1.11	17.59				88
0	218	845	C	1	2	6	32	1	0	0	0	1	0	1	0	0	0	0	0	0	0	0			5	1.61	3.89	19	1.24	10.14	47	1.38	3.71				77
0	202	990	C	0	5	8	33	1	0	1	0	1	1	0	1	0	0	0	0	0	0	1	39	241	7	1.17	7.58	18	1.25	9.17	39	0.91	21.14				69
1	201	760	C	0	8	9	35	1	0	0	0	1	1	1	0	0	1	1	0	0	0	1	105	306	6	1.16	11.29	20	1.42	7.33	39	1.62	10.02				123
0	221	820	C	0	5	7	30	1	0	1	0	1	0	0	1	0	0	0	0	0	0	1	17	238	6	1.76	6.09	17	1.19	33.8	38	1.58	5.98				74
0	197	1015	V	0	9	10	32	1	0	0	0	0	0	1	0	0	0	0	0	0	0	0			8	1.5	8.46	15	1.46	8.8	54	1.23	3.2				65
1	218	1265	C	0	7	9	34	1	0	0	0	0	0	0	0	0	0	0	0	0	0	0			7	1.69	2.89	15	1.49	7.47	29	1.32	6.11				71
0	198	995	C	0	4	7	32	1	1	0	1	0	1	0	1	1	0	0	0	0	0	0			7		3.59	28	1.31	7.1	39	1.79	2.71				82
0	178	660	V	1	6	7	32	1	1	0	0	0	1	1	1	0	0	0	1	0	0	0			8	1.01	13.6	28	1.24	7.39	43	1.11	7.59	66	1.07	6.45	102
1	222	2275	C	0	1	5	35	1	0	0	0	0	0	0	0	0	0	0	0	0	0	0			6	1.31	3.54	18	1.7	2.27	56	0.84	1.48				64
0	210	1115	C	0	5	6	32	1	1	0	0	0	1	0	0	1	0	0	0	0	0	1	113	323	5	1.51	7.7	28	1	10.62	50	1.25	5.3				67
0	192	1065	V	0	5	6	35	1	0	0	0	0	1	0	1	0	0	0	0	0	0	0			9	1.27	1.98	24	1.85	6.91	45	1.38	3.36				76
0	203	890	C	0	6	7	32	1	0	0	0	1	1	0	0	0	0	0	0	0	0	0			8	1.63	5.02	28	1.49	7.33	42	1.31	3.78				60
0	169	530	C	0	4	6	42	1	1	0	0	0	1	1	1	0	1	0	1	0	0	0			9	1.16	5.08	24	1.57	6.3	44	0.99	3.18				109
1	198	1025	C	0	2	4	30	1	1	0	0	0	1	0	1	0	0	0	0	0	0	1	41	239	7	1.2	1.91	28	1.02	17.87	41	1.13	21.86				60
0	195	990	C	1	3	6	29	1	0	0	0	0	1	0	1	0	0	0	0	0	0	0			9	0.95	3.73	20	0.99	6.95	41	1.3	4.08				62
0	163	590	V	1	1	3	34	1	0	0	0	0	1	0	1	0	1	1	1	0	0	0			9	0.95	2.72	28	0.8	1.43	54	1.13	1.44				103
1	172	630	V	1	4	6	34	1	0	0	0	0	1	0	1	0	0	0	1	0	0	0			6	0.96	3.03	19	0.79	2.65	29	1.42	6.29	85	1.62	3.91	108
0	186	510	C	0	4	7	33	0	0	1	0	1	1	1	1	0	0	0	0	0	0	0			7	1.23	18.03	15	1.25	8.86	39	1.31	2.15				121
1	203	1180	V	0	5	7	30	1	1	1	0	0	0	0	0	0	1	0	0	0	0	0			6	0.8	6.53	20	1.61	7	40	1.63	2.83				61
1	189	1205	V	0	3	7	33	1	1	0	0	0	1	1	0	0	1	0	0	0	1	0			6	0.73	2.13	23	1.19	7.55	45	1.63	5.75				94
0	196	890	C	0	8	9	33	1	0	1	0	0	0	0	0	0	0	0	0	0	1	0			8	1.92	4.76	16	1.32	6.26	40	1.34	1.09				96
1	189	1210	C	0	5	7	33	1	0	0	0	0	0	1	0	0	0	0	0	0	0	1	21	210	8	1.03	8.62	21	0.58	112.1	30	1.9	7.13				78
0	184	855	C	0	1	3	37	1	0	1	0	0	1	1	1	0	1	1	1	0	1	1	26	210	9	1.63	4.5	26	0.45	36.94	38	0.88	119.2				108
0	197	995	V	0	5	7	26	1	1	0	0	0	1	1	0	0	0	0	0	0	0	0			6	1.73	8.9	20	1.72	19.23	30	1.94	6.18				85
0	191	1033	C	0	5	6	28	1	1	0	0	0	1	0	1	0	0	0	0	0	0	0			9	1.51	4.14	28	1.42	3.95	50	1.58	1.23				90
0	177	655	C	0	4	5	38	1	0	0	0	0	1	0	0	0	0	0	1	0	0	0			5	1.52	0.5	19	1.05	4.19	33	1.17	2.68				100
1	191	940	C	1	1	3	34	1	0	0	0	0	1	1	0	0	1	1	0	0	0	0			7	0.9	3.37	22	1.46	3.17	49	1.59	3.92				90
1	191	900	C	1	4	4	34	1	0	0	0	0	1	1	0	0	0	0	1	0	0	0			7	1.41	3.62	21	0.92	9.73	39	1.7	6				96
1	176	850	C	0	3	7	31	1	0	0	0	0	1	0	1	0	1	0	1	0	0	0			7	1.27	6.5	18	1.23	4.11	37	1.69	2.3				92
0	203	1096	V	0	4	5	30	1	1	0	0	0	1	0	0	0	1	1	0	0	0	0			6	1.35	1.04	20	1.97	4.1	34	1.57	2.09				95
0	190	530	C	0	1	5	40	1	0	0	0	1	1	1	1	0	0	1	1	0	0	1	42	232	9	1.53	13.66	28	1.54	5.59	42	1.41	35.16				569
0	185	828	C	0	1	4	35	1	1	0	0	0	1	1	0	0	0	0	0	0	0	0			7	0.88	3.05	25	1.28	3.25	47	1.41	2.95				109
1	180	1010	C	1	2	4	37	0	1	0	0	0	1	1	1	0	0	0	1	0	0	0			6	0.9	3.67	23	1.24	4.29	33	1.36	3.77				129
0	180	795	C	1	4	7	37	0	1	0	0	0	1	1	1	0	1	0	0	0	0	0			6	1.06	2.99	22	1.5	2.55	34	1.38	1.7				105
0	180	830	C	1	4	7	37	0	1	0	0	0	1	1	1	0	1	0	1	0	0	0			6	0.51	0.46	27	1.19	8.24	47	1.43	3.5				173
1	192	430	C	0	3	7	34	1	0	1	0	1	1	1	0	0	0	0	0	1	1	0			6	1.06	0.88	25	1.51	7.11	33	1.5	7.75	60	1.17	3.75	123
0	200	790	C	0	4	8	31	1	0	1	0	1	1	1	1	0	1	1	0	0	0	0			6	1.46	18.32	20	1.28	12.91	55	1.2	12.18	62	0.96	8.04	158
1	200	1280	C	1	5	7	33	1	1	0	0	0	0	0	0	0	0	0	0	0	0	0			7	1.47	1.35	24	1.76	2.79	45	1.38	0.72				68
0	197	1160	V	0	4	2	30	1	1	0	0	0	1	1	1	0	0	0	0	0	0	0			9	1	2.5	20	1.12	12.74	41	1.01	3.37				81
1	174	830	V	0	5	7	33	1	0	0	0	0	1	1	1	0	1	0	1	0	0	0			7	0.89	1.31	19	1.01	1.91	47	1.11	2.68				112
1	214	1700	C	0	5	7	36	1	0	0	0	0	1	0	1	0	0	0	0	0	0	0			7	1.38	1.64	21	1.32	2.35	42	1.38	1.83				61
1	198	1100	V	0	6	6	35	1	1	0	0	0	0	0	0	0	0	0	0	0	0	0			7	1.24	6.3	20	1.59	6.84	41	1.35	3.33				68
1	218	1970	V	0	8	9	29	1	1	0	0	0	0	0	0	0	0	0	0	0	0	0			7	1.58	4.41	21	1.36	7.86	42	1.63	8.24	67	1.14	2.49	62
0	204	1490	V	0	5	7	38	1	1	0	0	0	0	0	0	0	0	0	1	0	1	0			7	1.5	1.46	28	1.34	2.8	56	1.28	3.71				96
1	220	1210	V	0	6	6	31	1	0	0	0	0	1	1	1	0	0	1	0	0	0	0			6	1.28	6.5	26	1.38	14.49	33	1.49	11.4	69	1.37	4.17	61
0	202	1290	C	0	3	1	36	1	0	0	0	0	1	0	0	1	0	1	0	0	0	0			6	1.29	8.46	23	1.48	3.12	47	1.24	5.05				65
1	206	960	V	0	1	3	34	0	0	0	0	0	1	0	0	0	0	0	0	0	0	0			6	2.04	4.17	25		4.16	46	1.36	3.34				63
1	170	750	V	0	2	7	32	1	1	0	0	0	1	1	1	0	1	0	0	0	0	0			9	0.93	2.29	20	1.56	2.26	38	1.63	8.28	90	1.53	4.43	116
0	190	759	V	1	6	8	32	1	1	0	0	0	1	1	1	0	0	0	1	0	0	0			6	1.21	0.55	27	1.44	1.4	41	1.37	2.75				97
1	190	870	V	1	6	8	32	1	1	0	0	0	1	1	0	0	0	0	0	0	0	0			6	1.23	1.29	16	0.95	2.56	36	1.58	4.62				87
1	177	770	V	0	5	7	30	1	1	0	0	0	1	1	0	0	1	0	0	0	0	0			6	1.09	2.55	22	1.16	0.35	36	1.27	2.66				89
1	178	710	C	0	2	5	35	1	1	0	0	0	1	1	1	0	0	0	0	0	1	0			8	1.02	3.46	26	1.49	1.02	47	1.29	0.93				464
0	195	1100	C	0	5	6	26	1	0	0	0	0	1	0	1	0	0	0	0	0	0	1	21	216	7	1.16	5.01	21	0.95	68.24	34	1.19	55.24				82
0	166	690	V	0	2	3	31	0	1	0	0	0	1	1	1	1	0	1	1	0	0	0			7	1.25	5.3	26	1.07	1.27	49	1.53	4.02				119
1	213	1400	C	0	5	7	35	0	0	0	0	0	0	0	0	0	0	0	0	0	0	0			7	1.51	4.52	20	1.35	6.8	55	1.2	3.16				70
1	173	680	V	0	1	3	33	1	1	1	1	0	1	1	1	0	1	1	1	0	0	0			7	0.64	4.06	25	1.24	4.1	49	1.67	3.11				439
0	197	890	C	1	1	3	28	1	0	0	0	0	1	1	1	0	0	0	0	0	0	0			7	1	1.88	18	1.85	4.37	32	1.5	4.41				89
0	197	1120	V	0	1	6	31	1	1	0	0	0	1	0	0	0	0	0	1	0	0	0			7	1.81	2.57	27	1.4	3.59	48	1.46	4.16				88
0	202	1370	V	0	4	3	29	1	0	0	0	0	1	0	0	1	0	1	0	0	0	1	11	213	9	0.66	68.16	22	1	50.91	36	0.51	282.1				87
1	174	860	V	0	1	2	34	0	0	0	0	0	1	1	1	0	1	1	1	0	0	1	11	185	7	0.67	0.05	18	0.89	1.05	32	1.17	1.15				114
1	212	1370	V	0	6	8	34	1	1	0	0	0	0	0	0	0	0	1	0	0	0	0			9		3.48	28	1.81	7.77	50	1.24	3.35				60
0	217	720	C	0	4	6	32	1	0	0	0	1	0	0	0	1	0	1	0	0	0	0			7		4.72	21	1	5.52	53	1.16	4.92				83
0	215	1590	C	0	4	7	35	1	0	0	0	0	1	0	0	0	0	0	0	0	0	0			7	1.37	2.47	25	1.52	6.1	45	1.25	3.83				81
0	210	920	C	0	5	6	33	1	0	1	0	1	1	1	1	0	0	0	0	0	0	0			6	1.77	12.52	20	1.91	9.9	34	1.52	7.27	79	1.12	5.65	74
1	207	1290	C	0	4	7	38	1	0	1	0	0	1	0	0	0	0	0	0	0	0	0			7	1.51	3.5	28	1.32	10.97	46	1.36	9.13	60	1.29	2.77	63
1	217	830	C	1	5	7	33	1	0	0	0	1	0	0	0	0	0	0	1	0	0	0			7	1.75	2.71	21	1.46	4.44	42	1.55	1.86				60
0	217	2080	C	1	4	6	33	1	0	0	0	0	1	0	1	0	0	0	0	0	0	0			9	1.49	1.87	27	1.55	1.71	52	1.49	2.65				60
1	189	820	V	0	1	4	30	0	0	0	0	1	1	1	1	0	0	0	1	0	0	1	15	204	7	0.8	4.18	15	0.54	12.13	29	1.4	1.34				99
1	183	980	C	0	3	3	35	0	0	0	0	0	1	1	1	0	0	0	1	0	0	0			7	0.81	3.03	28	0.86	1.26	44	1.16	1.93				90
0	205	1320	C	0	6	8	35	0	1	0	0	0	1	0	0	0	0	1	0	0	0	0			7	1.29	4.41	21	1.65	4.03	46	2.04	0.92				63
0	168	650	C	0	3	7	30	0	0	0	0	0	1	1	1	0	1	0	1	0	0	1	9	177	7	0.73	18.79	19	1.12	11.55	39	2.04	0.92				117
0	191	460	C	0	1	4	39	1	0	1	0	0	1	1	1	1	0	0	0	0	0	0			6	0.94	5.43	18	0.17	9.5	36	1.27	2.9				113
0	189	810	C	0	4	6	32	1	1	0	0	0	1	1	0	1	1	1	1	0	0	0			6	1.04	2.41	28	1.35	1.12	43	1.3	3.25				120
0	178	920	C	0	4	7	37	1	0	0	0	0	1	1	1	0	1	0	0	0	0	0			6	0.74	3.29	20	0.95	6.69	39	1.08	4.7				97
1	206	940	C	0	5	7	33	1	0	1	0	1	0	0	0	0	0	0	0	0	0	1	34	240	6	2.07	8.79	20	1.3	18.99	34	0.66	109.2				56
0	194	1030	V	0	3	7	37	1	1	0	1	0	1	1	1	0	0	0	0	0	0	0			5	1.51	0.25	19	1.22	7.56	30	1.18	1.47				344
1	202	1180	V	0	4	8	32	1	1	0	1	0	0	0	0	0	0	0	0	0	0	0			6	1.16	4.17	19	1.43	19.75	37	1.65	9.63				56
1	209	650	C	1	5	6	32	1	0	0	0	1	1	0	0	0	0	0	0	0	0	0			7	1.3	3.57	18	1.19	10.29	46	1.02	6.5	67	1.24	2.51	89
1	209	1390	C	1	6	7	32	1	0	0	0	0	1	0	0	0	0	0	0	0	0	0			5	1.19	2.07	25	1.6	2.9	46	1.48	2.37				57
1	218	1655	V	0	2	5	38	1	0	0	1	0	1	0	1	0	0	0	0	0	0	0			5	1.34	1.5	22	1.91	5.04	42	1.3	2.02				56
1	175	490	C	0	3	6	41	1	0	1	0	1	1	1	1	0	1	0	1	0	0	0			9	0.82	6.97	21	1.18	5.88	39	1.37	2.64				128
1	190	1000	C	0	0	4	33	0	1	0	0	0	1	0	0	1	1	0	0	0	0	0			9	1.9	3	28	0.74	0.83	42	1.3	2.36				96
0	177	800	C	0	2	5	29	1	1	0	0	0	1	1	1	0	0	0	0	0	0	0			6	0.84	0.72	28	1.49	5.05	42	1.27	2.78				99
0	209	740	C	0	2	7	31	1	0	0	0	1	1	0	0	0	0	0	0	0	0	0			7	1.62	18.9	28	1.46	9.79	56	1.53	3.7				61
1	186	980	C	1	0	3	30	1	1	0	0	0	1	1	1	0	0	0	0	0	0	0			6	0.82	1.91	21	1.07	2.83	42	1.02	0.54				77
1	223	970	C	0	7	9	35	0	0	0	0	1	0	0	0	1	0	1	0	0	0	0			6	1.51	8.35	21	1.3	7.77	40	1.76	5.93				58
0	210	1630	C	0	5	7	29	1	0	0	1	0	0	0	0	0	0	0	0	0	0	0			6	1.54	3.52	21	1.69	3.29	42	1.63	2.52				67
0	179	730	C	0	4	6	34	1	1	0	0	0	1	1	1	2	1	0	1	0	0	0			7	1.09	1.21	21	1.36	1.89	41	1.48	1.02				123
0	180	640	C	1	4	6	33	1	1	0	0	0	1	1	1	0	0	0	1	0	0	1	43	223	9	1.48	10.94	22	1.09	14.86	43	0.12	200				116
1	180	703	C	1	4	6	33	1	1	0	0	0	1	1	1	0	0	0	1	0	0	1	28	208	9	0.86	0.3	28	0.23	413.2	43	1.91	23.48				87
1	182	920	V	0	5	6	30	1	1	0	0	0	1	1	0	0	1	1	0	1	0	1	69	251	8	1.41	2.93	23	1.39	4.38	43	1.47	3.05				146
1	187	1100	C	0	4	6	30	1	0	0	0	0	1	0	1	0	1	0	0	0	0	0			7	0.91	2.82	25	1.1	7.48	47	1.3	2.86				71
1	192	1210	C	0	5	7	31	1	1	0	0	0	1	1	0	0	0	0	0	0	0	0			7	1.5	2.69	21	1.72	3.63	49	1.64	4.86				66
1	200	1310	V	0	7	8	27	1	0	1	0	0	1	0	0	0	1	0	0	0	1	1	92	292	8	1.73	6.14	18	1.48	3.67	31	1.65	9.41				225
0	208	1420	V	0	4	6	32	0	0	0	0	0	1	0	0	0	0	0	0	0	0	0			6	1.42	6.83	19	1.43	2.36	36	1.49	3.71				60
1	219	1900	V	0	3	5	28	1	1	0	0	0	0	1	0	0	1	0	0	0	0	0			6	1.4	1.78	20	2.03	2.34	43	1.98	2.16				77
0	178	420	C	0	2	3	26	1	0	0	0	1	1	1	1	0	0	0	1	0	0	0			5	0.87	3.48	21	1.59	5.09	42	1.45	4.77				104
1	201	1140	V	0	4	6	29	1	0	0	0	0	0	1	1	0	0	0	0	0	0	0			7	1.64	1.96	21	1.74	1.8	42	1.43	1.41				71
0	211	1080	C	0	3	5	36	1	0	1	0	0	0	0	0	0	0	0	0	0	0	1	49	260	7	2.13	5.86	20	1.8	9.77	41	1.68	19.52				65
0	195	1100	V	1	6	8	35	1	1	0	0	0	1	0	0	0	0	0	0	0	0	0			6	1.75	3.11	20	1.35	2.85	41	1.79	3.38				83
0	195	1240	V	1	3	4	35	1	1	0	0	0	1	1	1	0	1	0	0	0	0	0			6	1.36	4.4	20	1.39	8.31	41	1.5	3.71				91
0	203	1200	C	1	6	8	34	1	0	0	0	0	1	0	1	0	0	0	0	0	0	0			6	1.6	5.25	27	0.91	3.43	49	1.84					61
1	203	1270	C	1	5	5	34	1	0	0	0	0	1	0	0	0	0	0	0	0	0	0			6	1.53	2.39	20	1.62	6.07	41	1.84	2.24				65
0	191	960	C	0	5	6	37	1	1	0	0	0	1	1	0	0	0	0	0	0	0	0			6	1.67	3.71	20		3.01	47	1.36	1.52				83
1	195	1090	C	1	6	7	32	1	0	0	0	0	1	0	0	0	0	0	0	0	0	0			6	1.59	2.25	18	1.69	5.67	39	1.66	2.52				71
1	195	1110	C	1	6	7	32	1	0	0	0	0	1	1	0	0	0	0	0	0	0	0			6	1.61	3.11	20	1.58	11.89	41	1.36	4.46				76
0	184	700	C	1	2	4	32	1	0	0	0	0	1	1	0	0	0	0	0	0	0	0			8	1.1	5.65	22	2	10.44	39	1.85	2.71				105
0	184	780	C	0	3	2	33	1	0	1	0	0	1	1	1	0	1	0	0	0	0	1	24	208	7	1.3	18.02	24	1.09	20.09	34	1.65	4.1				83
1	181	1010	V	1	4	5	34	1	1	0	0	0	1	1	1	0	1	0	1	0	0	0			7	1.01	1.85	23	1.2	3.6	40	1.5	2.79				94
0	181	870	V	1	4	5	34	1	1	0	0	0	1	1	0	0	0	0	0	0	0	0			5	1.39	4.13	26	1.51	1.67	43	1.5	2.79				94
1	172	880	C	1	3	7	31	1	0	0	0	0	1	1	0	1	1	0	0	0	0	0			5	1.69	0.67	26	1.52	5.66	44	1.18	7.58	91	1.69	7.09	145
1	195	1100	C	0	4	6	39	1	1	0	0	0	1	0	0	0	0	0	0	0	0	1	44	239	6	1.57	5.76	22	1.48	12.97	43	1.57	10.01				66
1	199	1230	V	0	6	8	31	1	0	0	0	0	0	1	0	0	0	0	0	0	0	0			7	1.95	2.66	21	1.78	5.85	35	1.68	1.64				76
1	213	1200	C	1	6	8	30	1	1	0	0	0	0	0	0	0	0	0	0	0	0	0			6	1.57	6.16	23	1.48	4.13	41	1.33	2.02				67
1	213	1320	C	1	5	7	30	1	1	0	0	0	0	0	0	0	0	0	0	0	0	0			6	1.71	3.47	20	1.57	3.95	41	1.25	4.31				67
0	204	1380	C	0	6	7	35	1	1	0	0	0	0	0	0	0	0	0	0	0	0	0			6	1.76	3.85	20	1.95	3.69	41	1.67	3.78				57
1	193	832	C	0	3	5	36	1	0	0	0	0	1	1	1	0	0	0	0	0	0	1	29	222	6	1.63	2.96	17	1.29	16.52	29	0.66	186.8				87
0	182	690	C	0	3	4	33	1	1	1	0	0	1	1	1	0	0	0	1	0	0	1	20	202	6	1.34	9.59	20	0.05	200	42	1.09	59.77				103
0	201	1360	C	1	4	7	36	1	0	0	0	0	0	0	0	0	1	1	0	0	0	1	27	228	6	1.39	3.39	27	1.2	57.83	52	1.85	1.01				63
0	168	620	C	0	1	1	32	1	0	0	0	0	1	0	1	0	0	0	1	0	1	0			7	1	4.09	19	1.02	2.51	33	1.2	1.01				112
